# Supplementary material for: Effects of Neutralization, Decoloration, and Deodorization on Polycyclic Aromatic Hydrocarbons during Laboratory-Scale Oil Refining Process
Source: Hindawi journal article supplement (doi:10.1155/2017/7824761), 2017-01-01
Supplement: f1 [file 7824761.f1.doc]

**Supporting information**

**Table S1** Precursor ions and daughter ions of 16 PAH standards and their isotope internal standards studied in this research, with respective mass spectrometry parameters

| Standard | Precursor ion  (m/z) | Daughter ion  (m/z) | DPa  (V) | EPb  (V) | CEc  (V) | CXPd  (V) | Internal Standard | Precursor ion  (m/z) | Daughter ion  (m/z) | DPa  (V) | EPb  (V) | CEc  (V) | CXPd  (V) |
| --- | --- | --- | --- | --- | --- | --- | --- | --- | --- | --- | --- | --- | --- |
| Nap | 127.9 | 102.1 | 100 | 9 | 40 | 20 | Nap-d8 | 136.2 | 134.2 | 100 | 9 | 30 | 20 |
| 127.2 | 100 | 9 | 40 | 20 | 132.2 | 100 | 9 | 30 | 20 |
| Acy | 153.0 | 152.2 | 100 | 9 | 35 | 20 | Acy-d8 | 160.9 | 159.1 | 100 | 8 | 30 | 20 |
| 151.1 | 100 | 9 | 35 | 20 | 160.2 | 100 | 8 | 30 | 20 |
| Ace | 153.9 | 152.2 | 110 | 9 | 55 | 20 | Ace-d10 | 163.9 | 160.2 | 110 | 9 | 55 | 20 |
| 127.1 | 110 | 9 | 55 | 20 | 162.3 | 110 | 9 | 55 | 20 |
| Fl | 165.9 | 165.2 | 90 | 9 | 30 | 20 | Fl-d10 | 176.0 | 174.2 | 90 | 8 | 30 | 15 |
| 164.1 | 90 | 9 | 30 | 20 | 172.2 | 90 | 8 | 30 | 15 |
| Phe | 177.9 | 176.2 | 110 | 9 | 55 | 20 | Phe-d10 | 188.0 | 184.2 | 110 | 9 | 55 | 20 |
| 152.2 | 110 | 9 | 55 | 20 | 186.2 | 110 | 9 | 55 | 20 |
| Ant | 177.9 | 176.2 | 110 | 9 | 55 | 20 | Ant-d10 | 189.0 | 187.1 | 110 | 9 | 55 | 20 |
| 152.2 | 110 | 9 | 55 | 20 | 188.1 | 110 | 9 | 55 | 20 |
| Flu | 202.0 | 200.1 | 100 | 8 | 55 | 20 | Flu-d10 | 212.0 | 208.2 | 100 | 8 | 55 | 20 |
| 201.2 | 100 | 8 | 55 | 20 | 210.2 | 100 | 8 | 55 | 20 |
| Pyr | 203.0 | 202.1 | 100 | 8 | 55 | 20 | Pyr-d10 | 213.0 | 211.2 | 100 | 8 | 55 | 20 |
| 201.1 | 100 | 8 | 55 | 20 | 209.2 | 100 | 8 | 55 | 20 |
| BaA | 228.0 | 226.2 | 100 | 8 | 55 | 15 | BaA-d12 | 240.0 | 236.2 | 100 | 8 | 55 | 15 |
| 202.1 | 100 | 8 | 55 | 15 | 238.2 | 100 | 8 | 55 | 15 |
| Chr | 228.0 | 226.2 | 100 | 8 | 55 | 15 | Chr-d12 | 240.0 | 236.2 | 100 | 8 | 55 | 15 |
| 202.1 | 100 | 8 | 55 | 15 | 238.2 | 100 | 8 | 55 | 15 |
| BbFlu | 252.2 | 250.2 | 100 | 8 | 55 | 15 | BbFlu-d12 | 264.0 | 260.3 | 100 | 8 | 50 | 15 |
| 226.1 | 100 | 8 | 55 | 15 | 262.3 | 100 | 8 | 50 | 15 |
| BkFlu | 252.2 | 250.2 | 100 | 8 | 55 | 15 | BkFlu-d12 | 264.0 | 260.3 | 100 | 8 | 50 | 15 |
| 226.1 | 100 | 8 | 55 | 15 | 262.3 | 100 | 8 | 50 | 15 |
| BaP | 253.2 | 252.1 | 100 | 8 | 55 | 15 | BaP-d12 | 264.0 | 260.3 | 100 | 8 | 50 | 15 |
| 251.1 | 100 | 8 | 55 | 15 | 262.3 | 100 | 8 | 50 | 15 |
| DBahA | 279.0 | 278.2 | 110 | 8 | 50 | 15 | DBahA-d14 | 293.1 | 291.3 | 160 | 10 | 46 | 10 |
| 277.2 | 110 | 8 | 50 | 15 | 292.2 | 160 | 10 | 46 | 10 |
| BghiP | 277.1 | 276.2 | 160 | 10 | 46 | 10 | BghiP-d12 | 289.0 | 287.3 | 160 | 10 | 46 | 10 |
| 275.2 | 160 | 10 | 46 | 10 | 285.3 | 160 | 10 | 46 | 10 |
| IP | 277.1 | 276.2 | 160 | 10 | 46 | 10 | IP-d12 | 289.0 | 287.3 | 160 | 10 | 46 | 10 |
| 275.2 | 160 | 10 | 46 | 10 | 285.3 | 160 | 10 | 46 | 10 |

aDeclustering potential

bEntrance potential

cCollision energy

dCell exit potential

**Table S2** Regression equations, correlation coefficients (*r2*), LOQs, LODs and concentration ranges of 16 PAHs

| PAH | Regression equation | Correlation coefficient (*r2*) | LOQ  (μg/kg) | LOD  (μg/kg) | Concentration range  (ng/mL) |
| --- | --- | --- | --- | --- | --- |
| Nap | *y*=0.00662*x*+0.0973 | 0.9992 | 0.52 | 0.156 | 0.5-250 |
| Acy | *y*=0.00813*x*+0.00661 | 0.9993 | 0.04 | 0.012 | 0.5-250 |
| Ace | *y*=0.00299*x*+0.000598 | 0.9994 | 0.04 | 0.012 | 0.5-250 |
| Fl | *y*=0.0052*x*-0.000331 | 0.9997 | 0.15 | 0.045 | 0.5-500 |
| Phe | *y*=0.00428*x*+0.00547 | 0.9999 | 0.04 | 0.012 | 0.5-1000 |
| Ant | *y*=0.00192*x*+0.000469 | 0.9997 | 0.02 | 0.006 | 0.5-250 |
| Flu | *y*=0.00497*x*+0.0107 | 0.9999 | 0.32 | 0.096 | 0.5-1000 |
| Pyr | *y*=0.0033*x*+0.00792 | 0.9996 | 0.05 | 0.015 | 0.5-500 |
| BaA | *y*=0.00464*x*+0.00359 | 0.9999 | 0.02 | 0.006 | 0.5-250 |
| Chr | *y*=0.00443*x*+0.00396 | 0.9995 | 0.43 | 0.129 | 0.5-250 |
| BbFlu | *y*=0.0086*x*+0.00324 | 0.9996 | 0.35 | 0.105 | 0.5-200 |
| BkFlu | *y*=0.0119*x*+0.00643 | 0.9996 | 0.02 | 0.006 | 0.5-100 |
| BaP | *y*=0.0178*x*+0.0843 | 0.9997 | 0.10 | 0.030 | 0.5-200 |
| DBahA | *y*=0.00894*x*+0.00432 | 0.9999 | 0.04 | 0.012 | 0.5-100 |
| BghiP | *y*=0.00558*x*+0.0028 | 0.9999 | 0.06 | 0.018 | 0.5-100 |
| IP | *y*=0.005*x*+0.00122 | 0.9996 | 0.02 | 0.006 | 0.5-100 |

**Table S3** Recoveries, intra and inter-day precisions of 16 PAHs in this study

| PAH | Background (μg/kg) | Low spike level (1 μg/kg) | | | | |  | Medium spike level (5 μg/kg) | | | | |  | High spike level (10 μg/kg) | | | | |
| --- | --- | --- | --- | --- | --- | --- | --- | --- | --- | --- | --- | --- | --- | --- | --- | --- | --- | --- |
| Recovery (%) | RSDa (%) | | RSDb (%) | |  | Recovery (%) | RSDa (%) | | RSDb (%) | |  | Recovery (%) | RSDa (%) | | | RSDb (%) |
| Nap | 2.37 | 78.9 | | 7.5 | | 8.9 |  | 81.6 | | 6.3 | | 6.6 |  | 77.8 | | 5.9 | 6.1 | |
| Acy | 3.38 | 85.7 | | 3.8 | | 3.8 |  | 78.9 | | 3.1 | | 3.6 |  | 82.7 | | 2.6 | 4.2 | |
| Ace | 2.17 | 84.4 | | 3.9 | | 4.2 |  | 86.9 | | 3.3 | | 2.3 |  | 84.0 | | 2.7 | 3.1 | |
| Fl | 1.28 | 78.5 | | 2.0 | | 3.3 |  | 90.6 | | 2.6 | | 3.8 |  | 93.2 | | 1.5 | 3.3 | |
| Phe | 2.87 | 94.0 | | 4.2 | | 5.0 |  | 93.7 | | 5.1 | | 3.4 |  | 93.8 | | 3.6 | 2.8 | |
| Ant | 2.32 | 95.5 | | 3.6 | | 4.9 |  | 102.9 | | 3.0 | | 4.7 |  | 103.1 | | 2.2 | 5.0 | |
| Flu | 3.74 | 88.4 | | 4.5 | | 3.3 |  | 92.1 | | 3.6 | | 4.1 |  | 92.0 | | 1.9 | 3.6 | |
| Pyr | 4.40 | 83.5 | | 3.2 | | 3.1 |  | 101.4 | | 4.4 | | 5.2 |  | 106.4 | | 3.1 | 3.7 | |
| BaA | 2.30 | 91.8 | | 4.3 | | 3.4 |  | 100.4 | | 3.3 | | 3.8 |  | 93.1 | | 3.5 | 5.2 | |
| Chr | 3.00 | 90.1 | | 2.9 | | 3.1 |  | 93.1 | | 2.4 | | 2.8 |  | 95.5 | | 4.1 | 2.3 | |
| BbFlu | 2.76 | 88.0 | | 3.0 | | 3.9 |  | 89.0 | | 5.1 | | 4.0 |  | 93.1 | | 2.4 | 3.6 | |
| BkFlu | 1.89 | 87.4 | | 2.8 | | 2.5 |  | 88.9 | | 3.3 | | 3.2 |  | 93.2 | | 3.7 | 3.3 | |
| BaP | 1.50 | 92.3 | | 5.2 | | 4.5 |  | 90.9 | | 4.0 | | 7.0 |  | 93.5 | | 2.4 | 3.0 | |
| DBahA | 1.49 | 86.4 | | 4.5 | | 2.9 |  | 87.6 | | 3.9 | | 4.7 |  | 91.1 | | 4.2 | 3.5 | |
| BghiP | 1.11 | 82.9 | | 7.5 | | 5.3 |  | 85.3 | | 5.4 | | 4.9 |  | 94.0 | | 4.9 | 3.1 | |
| IP | 2.76 | 85.3 | | 3.3 | | 4.0 |  | 88.6 | | 2.6 | | 4.4 |  | 93.2 | | 1.3 | 2.7 | |

aRSD of intra-day precision

bRSD of inter-day precision

**Table S4** LC conditions and instrumental parameters

| Equipment/Parameter | Specification |
| --- | --- |
| Liquid chromatograph | Agilent 1200 rapid resolution liquid chromatograph |
| Mass spectrometer | API 5500 triple quadruple mass spectrometer equipped with a PhotoSpray Ion source |
| Analytical column | Agilent Zorbax Eclipse PAH column (2.1 mm × 100 mm, 3.5 μm) |
| Mobile phase | Solvent A: acetonitrile, solvent B: water |
| Linear gradient program | 0-5 min, 45% A |
| 5-15 min, linear change from 45% to 100% A |
| 15-21 min, 100% A |
| 21-22 min, linear change from 100% to 45% A |
| Flow rate | 0.4 mL/min |
| Column temperature | 25 °C |
| Injection volume | 5 μL |
| Mass spectrometry conditions | Ion transfer voltage: 800 V; ion spray temperature: 650 °C; curtain gas: 10 psi; collision gas: 7 psi; ion source gas 1: 80 psi; ion source gas 2: 60 psi; the dwell time: 50 ms; ionization mode: positive ion; resolution: Q1: unit; Q3: unit. |
| Dopant | Toluene |
